# Supplementary material for: Prospective Clinical Evaluation of the Diagnostic Accuracy of a Highly Sensitive Rapid Antigen Test Using Silver Amplification Technology for Emerging SARS-CoV-2 Variants
Source: MDPI journal article supplement (doi:10.3390/biomedicines10112801), 2022-11-03
Supplement: s1 [file s1]

Supplementary Materials

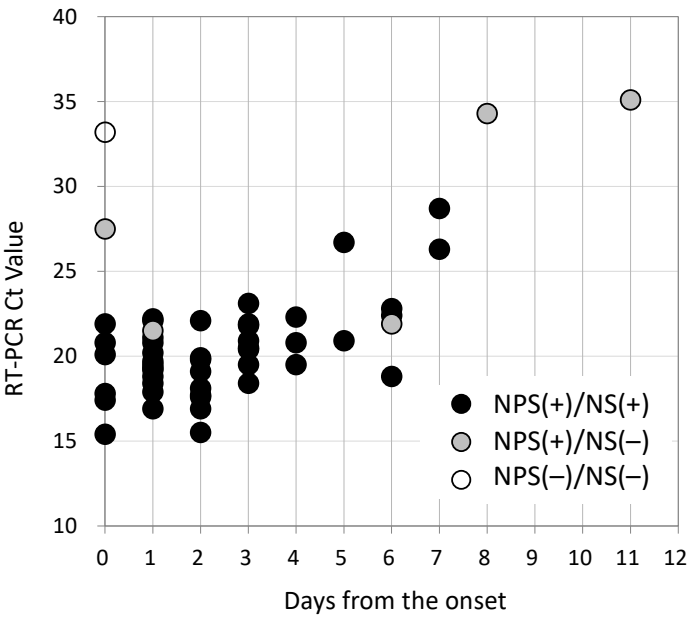

**Figure S1.** Relationship between Ct values and days after onset for 52 individuals and their antigen rapid diagnostic tests (Ag-RDTs).
